# Supplementary material
Source: PubMed Central journal article supplement (PMC10529627)
Supplement: NIHMS1912450-supplement-1.pdf [file NIHMS1912450-supplement-1.pdf]

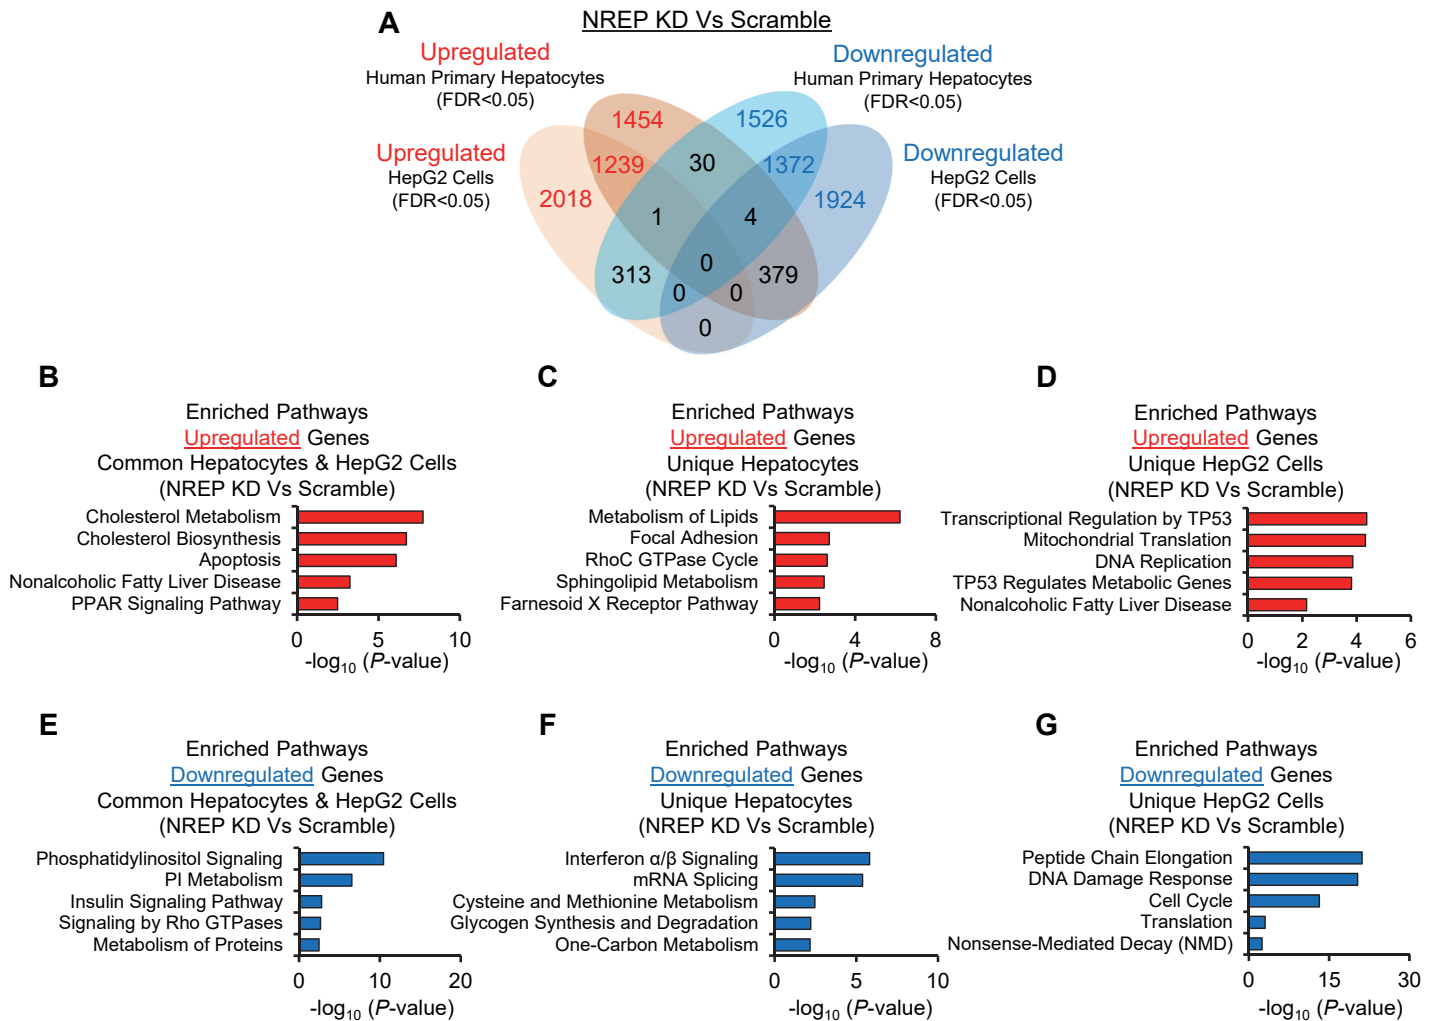

**Supplementary Figure 1 (Related to Figure 1): Comparative transcriptomic impact of NREP silencing in HepG2 cells and primary human hepatocytes.** (A) Venn diagram of intersected genes between NREP knock-down (KD) versus Scramble in primary human hepatocytes and HepG2 cells (GSE141078). (B-D) Pathway enrichment analyses on upregulated genes common between primary human hepatocytes and HepG2 (B); unique in primary human hepatocytes (C); or unique in HepG2 (D). (E-G) Pathway enrichment analyses on downregulated genes common between primary human hepatocytes and HepG2 (E); unique in primary human hepatocytes (F); or unique in HepG2 (G). Statistical analyses by Benjamini-Hochberg method (see Methods). All represented genes with FDR<0.05.

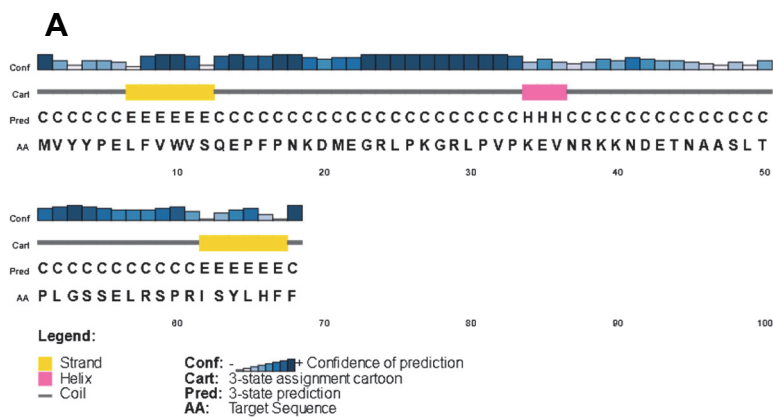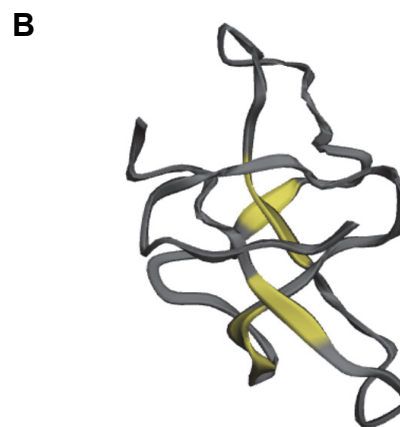

**C Molecular Function Predictions**

| GO term    | Name                                                        | SVM Reliability |
|------------|-------------------------------------------------------------|-----------------|
| GO:0003676 | nucleic acid binding                                        | H               |
| GO:0003677 | DNA binding                                                 | H               |
| GO:0003824 | catalytic activity                                          | H               |
| GO:0003700 | sequence-specific DNA binding transcription factor activity | H               |
| GO:0001071 | nucleic acid binding transcription factor activity          | H               |
| GO:0008092 | cytoskeletal protein binding                                | H               |
| GO:0016773 | phosphotransferase activity, alcohol group as acceptor      | H               |
| GO:0003723 | RNA binding                                                 | H               |
| GO:0003779 | actin binding                                               | H               |
| GO:0000166 | nucleotide binding                                          | H               |
| GO:0030695 | GTPase regulator activity                                   | H               |
| GO:0016740 | transferase activity                                        | H               |
| GO:0005516 | calmodulin binding                                          | H               |
| GO:0015631 | tubulin binding                                             | H               |

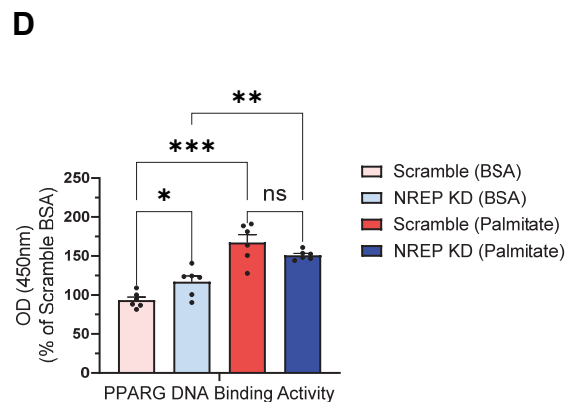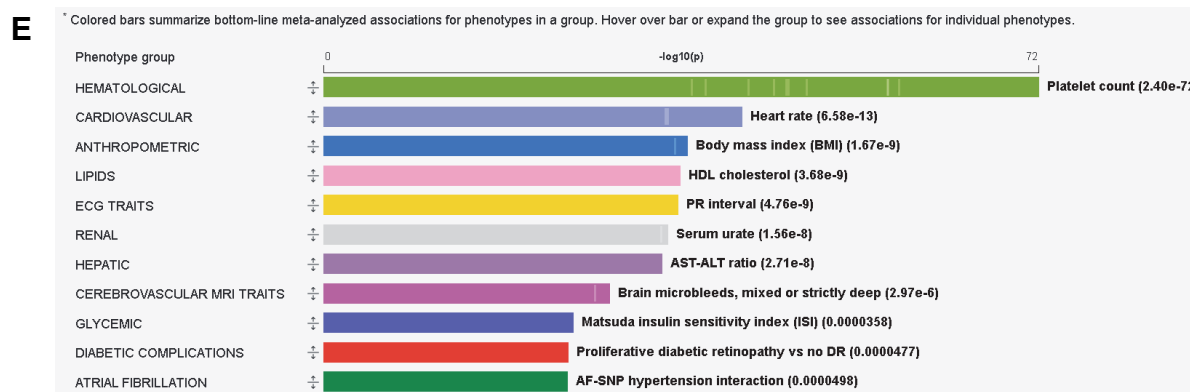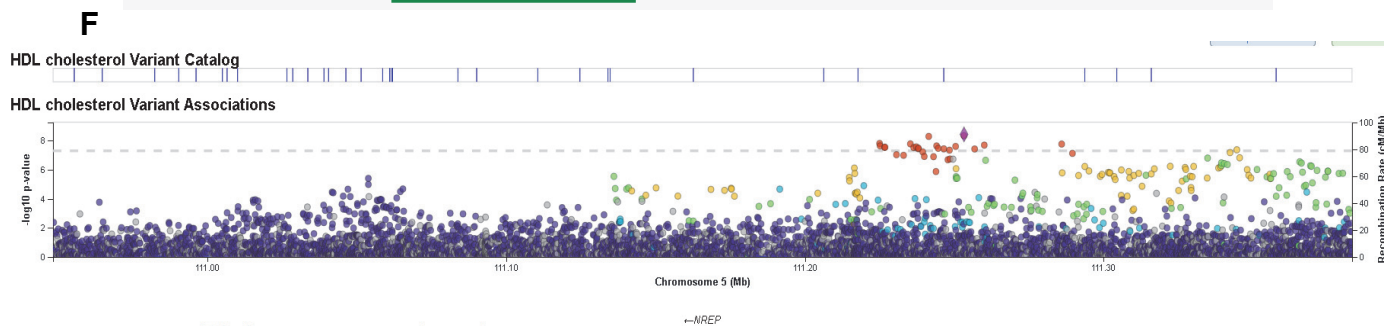

**G**

| varId           | alt | beta    | chromosome | n       | pValue   | phenotype | reference | stdErr | zScore | reference |
|-----------------|-----|---------|------------|---------|----------|-----------|-----------|--------|--------|-----------|
| 5:111253269:T:C | C   | 0.0076  | 5          | 1681390 | 3.69E-09 | HDL       | T         | 0.0012 | 5.898  | T         |
| 5:111253225:C:A | A   | 0.0075  | 5          | 1681390 | 4.56E-09 | HDL       | C         | 0.0012 | 5.862  | C         |
| 5:111241454:G:A | A   | 0.0074  | 5          | 1694140 | 5.08E-09 | HDL       | G         | 0.0012 | 5.845  | A         |
| 5:111225001:C:A | A   | 0.0072  | 5          | 1668960 | 1.56E-08 | HDL       | C         | 0.0012 | 5.655  | A         |
| 5:111235304:A:C | C   | 0.0072  | 5          | 1681390 | 1.66E-08 | HDL       | A         | 0.0012 | 5.645  | A         |
| 5:111285955:C:G | G   | -0.0072 | 5          | 1678500 | 1.71E-08 | HDL       | C         | 0.0012 | -5.639 | G         |
| 5:111260051:A:G | G   | 0.0073  | 5          | 1776130 | 2.02E-08 | HDL       | A         | 0.0012 | 5.61   | A         |
| 5:111225171:C:T | T   | 0.0072  | 5          | 1668960 | 2.27E-08 | HDL       | C         | 0.0012 | 5.59   | C         |
| 5:111244077:G:C | C   | 0.0071  | 5          | 1681390 | 2.29E-08 | HDL       | G         | 0.0012 | 5.589  | G         |
| 5:111250451:T:A | A   | 0.0073  | 5          | 1775690 | 2.48E-08 | HDL       | T         | 0.0012 | 5.575  | T         |

**Supplementary Figure 2 (Related to Figure 1): *In silico* prediction of NREP protein structure and functions and GWAS meta-analyses phenotype associations with NREP loci.** (A) NREP protein structure domains and features. (B) NREP 3D structure modeling. (C) Molecular function predictions for NREP based on its theoretical structure. In (A) and (B) the terms represent those predicted where support vector machine (SVM; a machine learning technique) training includes assigned GO terms across all evidence code types. SVM reliability is regarded as High (H) when sensitivity, specificity, and precision are jointly above a given threshold. Otherwise, reliability is indicated as Low (L). Terms with lower reliability are not shown. (D) PPAR $\gamma$  transcription binding activity in nuclear extracts of HepG2 cells (n=6 biological replicates/group). (E) Summary of bottom-line associations with represented phenotypes. Associations are clumped by linkage disequilibrium (complete list in Supplementary Table 1). (F) LocusZoom interactive visualization of bottom-line *P*-values for variant associations with HDL cholesterol across NREP loci (complete list in Supplementary Table 2). (G) Top SNPs associations table with HDL cholesterol across NREP loci. Data retrieved from the Common Metabolic Disease Risk Knowledge Portal. Statistical analyses by One-way ANOVA with LSD test in D.

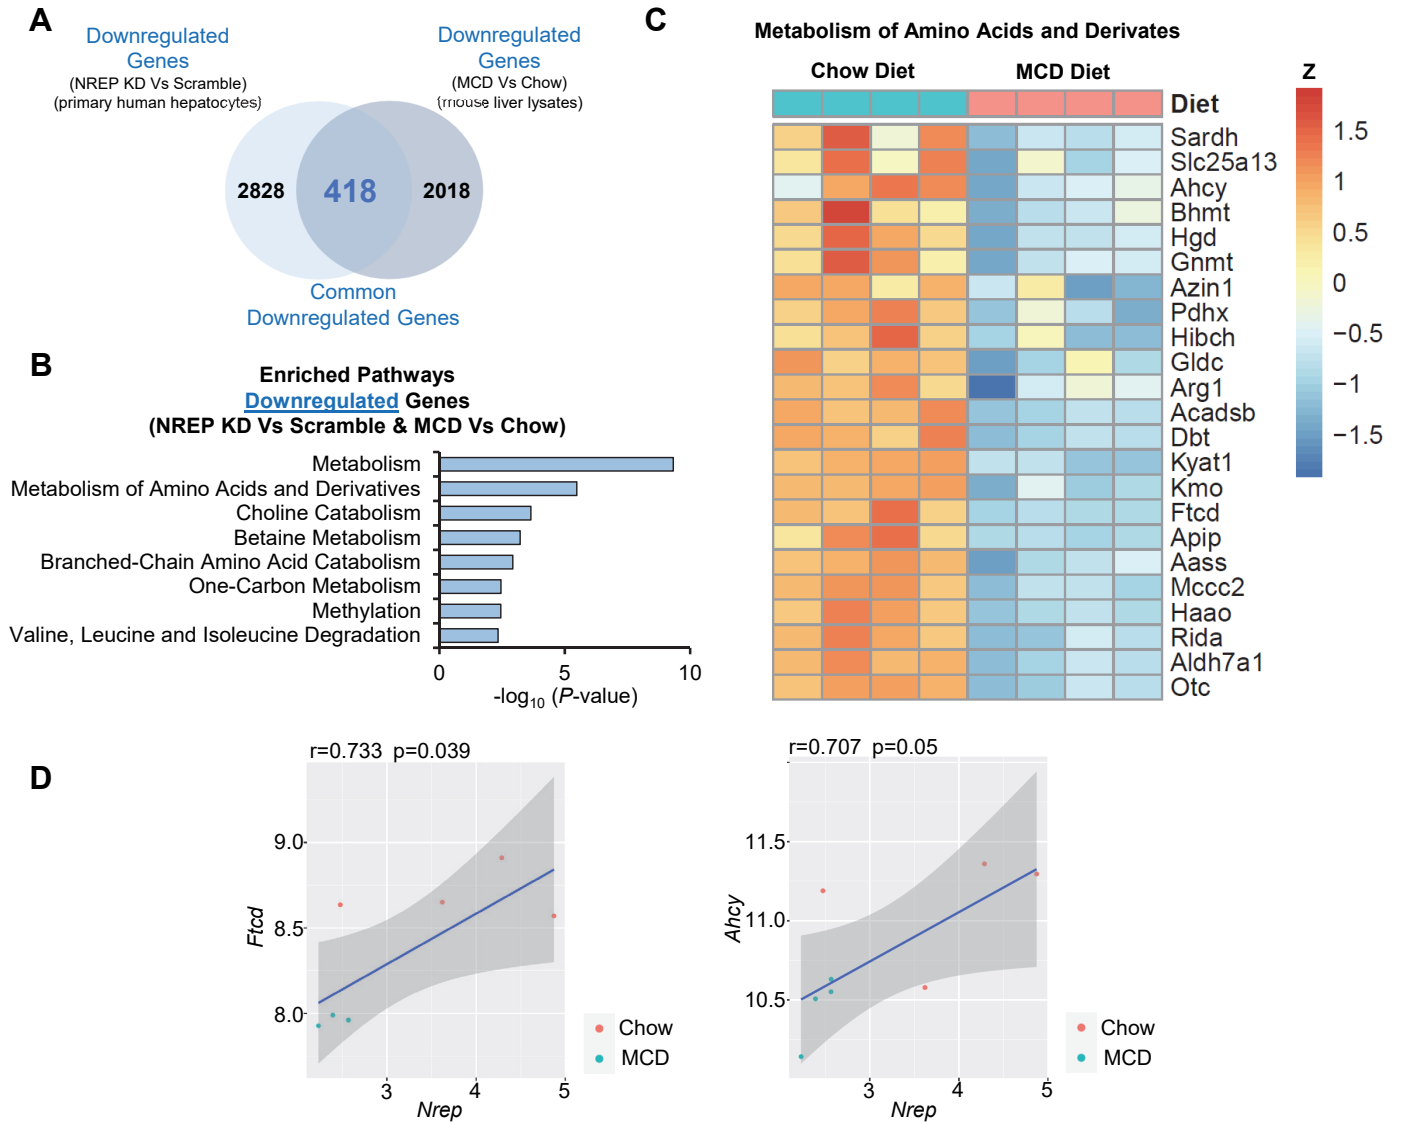

**Supplementary Figure 3 (Related to Figure 2): NREP silencing in hepatocytes recapitulates the downregulation of one-carbon metabolism genes seen in the methionine/choline-deficient diet (MCD) model of NASH.** (A) Venn diagram of intersected downregulated genes between NREP knock-down (KD) versus Scramble in primary human hepatocytes and liver lysates from methionine-choline deficient diet (MCD) versus Chow diet (n=4 biological replicates/group) (Tomohiko K & Kulkarni RN, unpublished). (B) Pathway enrichment analyses on intersected genes. (C) Heat-map representation selected genes associated with metabolism of amino acids and commonly downregulated in the MCD model and NREP KD primary human hepatocytes. (D) Pearson's correlations between NREP and represented one-carbon metabolism genes in Chow and MCD liver lysates. Statistical analyses by Benjamini-Hochberg method.

**A**

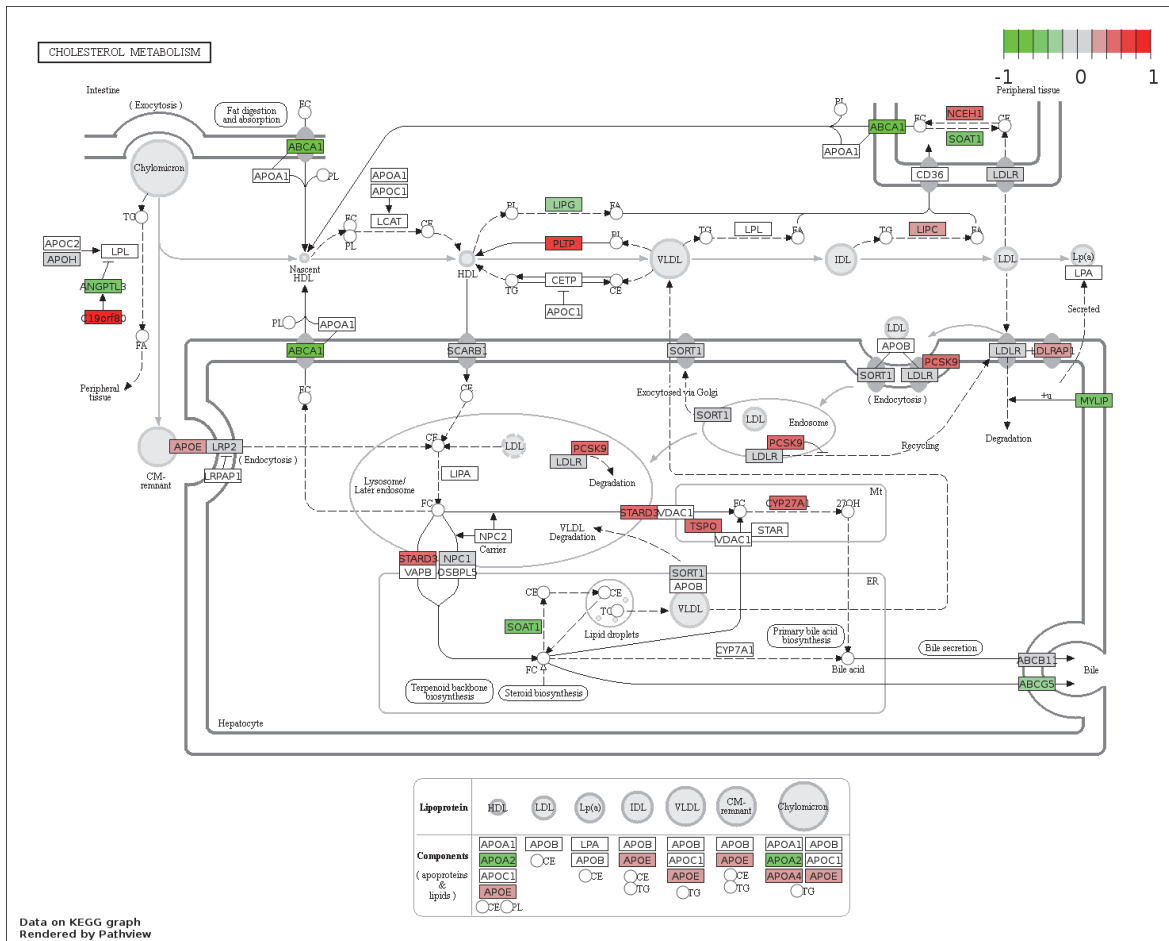

**B**

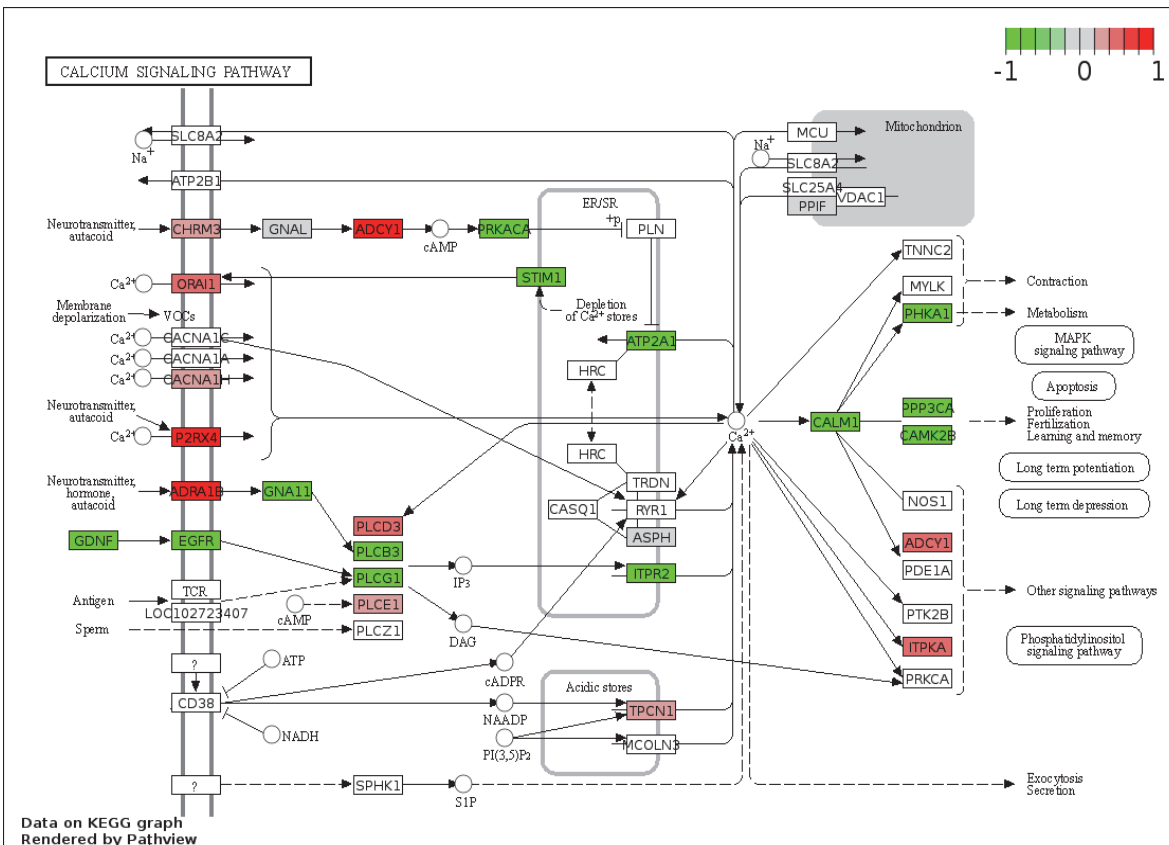

**SUPPLEMENTARY FIGURE 4**  
**(Related to Figure 3 and 4)**

**Supplementary Figure 4 (Relates to Figures 3 and 4): NREP downregulation impacts transcriptional regulation of cholesterol and calcium signaling pathways in primary human hepatocytes. (A)** Cholesterol metabolism signaling pathway. **(B)** Calcium signaling pathway. RNA-sequencing of NREP KD compared to Scramble in primary human hepatocytes. Colors indicate upregulated (red) or downregulated (green) genes. Genes selected with  $FDR < 0.05$ . Signaling pathways based on KEGG annotation and rendered by Pathview.
